# Supplementary material for: Measurement of screen time among young children aged 0–6 years: A systematic review
Source: PubMed Central journal article supplement — Obes Rev. 2021 May 7;22(8):e13260. doi: 10.1111/obr.13260 (PMC8365769; doi:10.1111/obr.13260), 2021-05-07
Supplement: OBR-22-e13260-s001.pdf [file OBR-22-e13260-s001.pdf]

Measurement of screen time among young children aged 0–6 years:  
a systematic review.

Rebecca Byrne, PhD; Caroline O Terranova, PhD; Stewart G Trost, PhD

Queensland University of Technology (QUT), School of Exercise and Nutrition Sciences, Faculty of Health, Centre for Children's Health Research (CCHR), South Brisbane, Qld 4101, Australia

**Key words:** Mobile devices, screen-based devices, infants, toddlers, pre-schoolers, psychometric properties

**Running title:** Measurement of screen time among children 0-6 years

**Acknowledgments:** The assistance of Queensland University of Technology librarian, Peter Sondergeld, regarding the search strategy is greatly appreciated. Funding from the National Health and Medical Research Council, Grant/Award Number: APP1101675 is acknowledged.

**Corresponding author:**

Professor Stewart Trost

Address: QLD Centre for Children's Health Research (CCHR), Queensland University of Technology, Level 6, 62 Graham Street, South Brisbane QLD 4101, Australia

Email: [s.trost@qut.edu.au](mailto:s.trost@qut.edu.au)

**Potential conflicts of interest:** none to disclose.

**Supplementary Table S1.** Search strategy – Measurement of screen time among young children aged 0–6 years: a systematic review

*Searches were conducted in March 2019 and updated to April 2020 by Caroline Terranova, Queensland University of Technology.*

**Database: PubMed (2009–2019)**

1. sedentar\* OR sedentary behavior [MeSH Terms]
2. "television" OR "TV" OR "DVD"
3. "computer" OR "laptop"
4. "video gam\*" OR videogam\* OR "electronic gam\*" OR gaming OR video games [MeSH Terms]
5. "screen time" OR screentime OR "screen media" OR "electronic media" OR "screen based" OR "touch screen" OR screen time [MeSH Terms]
6. "social media" OR Facebook OR YouTube OR Twitter OR Snapchat OR Instagram OR social media [MeSH Terms]
7. smartphone OR "smart phone" OR "cell phone" OR "mobile phone" OR iphone OR ipad OR "mobile device\*" OR cell phone use [MeSH Terms] OR cell phone [MeSH Terms]
8. or/1-7
9. child
10. children
11. toddler
12. infan\*
13. "infant" [MeSH Terms]
14. "preschool\*"
15. "pre-school\*"
16. "child, preschool"[MeSH Terms]
17. or/9-16
18. 8 and 17
19. limit 18 to ("Publication date" (2009) and ("Ages" (newborn infant: birth to 1 month) or (infant: 1 to 23 months) or (preschool child: 2 to 5 years))

**Supplementary Table S2. Articles reporting psychometric properties**

| <b>Study</b>                               | <b>Reliability Type</b> | <b>Reliability Metric</b> | <b>Reliability</b> <sup>1</sup> | <b>Validity Type</b> | <b>Validity</b> <sup>1</sup>                |
|--------------------------------------------|-------------------------|---------------------------|---------------------------------|----------------------|---------------------------------------------|
| Asfour et al (2015) <sup>59</sup>          | Internal consistency    | Composite reliability     | 0.72                            |                      |                                             |
| Armoon et al (2019) <sup>495</sup>         | Internal consistency    | Cronbach's alpha          | 0.78                            |                      |                                             |
| Chen et al (2018) <sup>108</sup>           | Internal consistency    | Cronbach's alpha          | 0.78–0.85                       |                      |                                             |
| Dawson-McClure et al (2014) <sup>85</sup>  | Internal consistency    | Cronbach's alpha          | 0.6                             |                      |                                             |
| Halim et al (2013) <sup>546</sup>          | Internal consistency    | Cronbach's alpha          | 0.81                            |                      |                                             |
| Hu et al (2018) <sup>481</sup>             | Internal consistency    | Cronbach's alpha          | 0.8                             |                      |                                             |
| Hudon et al (2013) <sup>149</sup>          | Internal consistency    | Cronbach's alpha          | 0.74                            |                      |                                             |
| Hutton et al (2020) <sup>13</sup>          | Internal consistency    | Cronbach's alpha          | 0.74                            | Convergent           | Cognitive test = -0.45, -0.57, -0.30, -0.42 |
| Hutton et al (2020) <sup>635</sup>         | Internal consistency    | Cronbach's alpha          | 0.74                            |                      |                                             |
| Nikken et al (2015) <sup>407</sup>         | Internal consistency    | Cronbach's alpha          | 0.53–0.86                       |                      |                                             |
| Schmiedeler et al (2014) <sup>351</sup>    | Internal consistency    | Cronbach's alpha          | 0.71                            |                      |                                             |
| Bacardi-Gascon et al (2012) <sup>404</sup> | Test-retest             | ICC                       | 0.86                            | Concurrent           | r = 0.34, Accelerometer                     |
| Barnett et al (2012) <sup>50</sup>         | Test-retest             | ICC                       | 0.23–0.55                       |                      |                                             |
| Bonn et al (2012) <sup>38</sup>            | Test-retest             | ICC                       | 0.85                            |                      |                                             |
| Campbell et al (2013) <sup>118</sup>       | Test-retest             | ICC                       | 0.84–0.86                       |                      |                                             |
| Cardon et al (2016) <sup>132</sup>         | Test-retest             | ICC                       | 0.67–0.81                       |                      |                                             |
| Carson et al (2017) <sup>125</sup>         | Test-retest             | ICC                       | 0.82                            |                      |                                             |
| Carson et al (2017) <sup>129</sup>         | Test-retest             | ICC                       | 0.82                            |                      |                                             |
| Carson et al (2019) <sup>126</sup>         | Test-retest             | ICC                       | 0.82                            |                      |                                             |
| Dawson-Hahn et al (2015) <sup>86</sup>     | Test-retest             | ICC                       | 0.82                            | Concurrent           | r = 0.45–0.55, Television allowance, EMA    |
| De Craemer et al (2015) <sup>80</sup>      | Test-retest             | ICC                       | 0.67–0.81                       |                      |                                             |
| De Craemer et al (2016) <sup>81</sup>      | Test-retest             | ICC                       | 0.67–0.81                       |                      |                                             |
| De Decker et al (2015) <sup>78</sup>       | Test-retest             | ICC                       | 0.34–0.7                        |                      |                                             |
| Dwyer et al (2011) <sup>77</sup>           | Test-retest             | ICC                       | 0.44                            | Concurrent           | r = 0.25, Accelerometer                     |
| Goncalves et al (2019) <sup>483</sup>      | Test-retest             | ICC                       | 0.98                            | Concurrent           | ICC = 0.5–0.8, Activity diary               |
| González-Gil et al (2014) <sup>179</sup>   | Test-retest             | ICC                       | 0.606–0.812                     |                      |                                             |

|                                        |             |               |                           |            |                                                                                      |
|----------------------------------------|-------------|---------------|---------------------------|------------|--------------------------------------------------------------------------------------|
| Hesketh et al (2015) <sup>165</sup>    | Test-retest | ICC           | 0.57 (range<br>0.20–0.92) |            |                                                                                      |
| Hesketh et al (2017) <sup>164</sup>    | Test-retest | ICC           | 0.69                      |            |                                                                                      |
| Hinkley et al (2012) <sup>158</sup>    | Test-retest | ICC           | 0.68                      |            |                                                                                      |
| Hinkley et al (2012) <sup>410</sup>    | Test-retest | ICC           | 0.52–1.00                 |            |                                                                                      |
| Hinkley et al (2013) <sup>159</sup>    | Test-retest | ICC           | 0.68                      |            |                                                                                      |
| Hinkley et al (2014) <sup>156</sup>    | Test-retest | ICC           | 0.49–0.74                 |            |                                                                                      |
| Hinkley et al (2017) <sup>157</sup>    | Test-retest | ICC           | 0.23–0.69                 |            |                                                                                      |
| Hinkley et al (2017) <sup>161</sup>    | Test-retest | ICC           | 0.68                      |            |                                                                                      |
| Hinkley et al (2018) <sup>162</sup>    | Test-retest | ICC           | 0.68–0.69                 |            |                                                                                      |
| Hnatiuk et al (2015) <sup>155</sup>    | Test-retest | ICC           | 0.84                      |            |                                                                                      |
| Keita et al (2014) <sup>235</sup>      | Test-retest | r             | 0.94                      |            |                                                                                      |
| Knowlden et al (2015) <sup>231</sup>   | Test-retest | Pearson's r   | 0.72                      |            |                                                                                      |
| Knowlden et al (2018) <sup>461</sup>   | Test-retest | Pearson's r   | 0.72                      |            |                                                                                      |
| Kong et al (2016) <sup>213</sup>       | Test-retest | r             | 0.94                      |            |                                                                                      |
| Lee et al (2017) <sup>209</sup>        | Test-retest | ICC           | 0.82                      |            |                                                                                      |
| Lee et al (2018) <sup>208</sup>        | Test-retest | ICC           | 0.82                      |            |                                                                                      |
| Lioret et al (2020) <sup>451</sup>     | Test-retest | ICC           | 0.69– >0.79               |            |                                                                                      |
| Lissner et al (2012) <sup>201</sup>    | Test-retest | Cohen's kappa | 0.56                      |            |                                                                                      |
| Loprinzi et al (2016) <sup>197</sup>   | Test-retest | ICC           | 0.67                      |            |                                                                                      |
| Mendoza et al (2013) <sup>272</sup>    | Test-retest | ICC           | 0.82                      | Concurrent | r = -0.18–0.04, Accelerometer, television allowance r = 0.45 - 0.55, EMA r=0.47-0.51 |
| Mendoza et al (2014) <sup>271</sup>    | Test-retest | ICC           | 0.82                      |            |                                                                                      |
| Mendoza et al (2016) <sup>273</sup>    | Test-retest | ICC           | 0.82                      | Concurrent | r = 0.45–0.55 Television allowance, EMA r = 0.47 -0.51                               |
| Must et al (2014) <sup>252</sup>       | Test-retest | Spearman's r  | 0.84–0.92                 |            |                                                                                      |
| Ogren et al (2020) <sup>448</sup>      | Test-retest | ICC           | 0.82                      | Concurrent | r = 0.84, Direct observation, television allowance r=0.45-0.55, EMA r=0.47-0.51      |
| Prioreschi et al (2019) <sup>440</sup> | Test-retest | ICC           | >0.40                     |            |                                                                                      |

|                                        |                                      |                                  |                                |            |                                   |
|----------------------------------------|--------------------------------------|----------------------------------|--------------------------------|------------|-----------------------------------|
| Schrempft et al (2015) <sup>606</sup>  | Test-retest                          | ICC                              | 0.87                           |            |                                   |
| Sigmund et al (2016) <sup>344</sup>    | Test-retest                          | ICC                              | 0.8                            |            |                                   |
| Swindle et al (2018) <sup>626</sup>    | Test-retest                          | % agreement                      | 0.63                           |            |                                   |
| Thompson et al (2013) <sup>323</sup>   | Test-retest                          | ICC                              | 0.61–0.68<br>and 0.79–<br>0.94 |            |                                   |
| Venetsanou et al (2020) <sup>418</sup> | Test-retest                          | ICC                              | 0.68                           |            |                                   |
| Verbestel et al (2015) <sup>390</sup>  | Test-retest                          | ICC                              | 0.49–0.74                      |            |                                   |
| Buscemi et al (2016) <sup>34</sup>     | Test-retest and internal consistency | Pearson's r,<br>Cronbach's alpha | 0.94 & 0.70                    |            |                                   |
| Cespedes et al (2014) <sup>532</sup>   |                                      |                                  |                                | Concurrent | r = 0.60, Direct observation      |
| Eijkemans et al (2019) <sup>490</sup>  |                                      |                                  |                                | Concurrent | r = 0.05, Accelerometer           |
| Francis et al (2011) <sup>191</sup>    |                                      |                                  |                                | Concurrent | r = 0.31–0.61, Direct observation |
| Janz et al (2017) <sup>135</sup>       |                                      |                                  |                                | Concurrent | r = 0.31–0.61, Direct observation |
| Loprinzi et al (2013) <sup>196</sup>   |                                      |                                  |                                | Concurrent | r = -0.26, Direct observation     |
| Okely et al (2009) <sup>241</sup>      |                                      |                                  |                                | Concurrent | r = -0.26, Accelerometer          |
| Sarker et al (2015) <sup>356</sup>     |                                      |                                  |                                | Concurrent | r = -0.05, Accelerometer          |
| Schary et al (2012) <sup>349</sup>     |                                      |                                  |                                | Concurrent | r = -0.26, Accelerometer          |
| Thompson et al (2018) <sup>321</sup>   |                                      |                                  |                                | Concurrent | r = 0.84, Direct observation      |
| Wen et al (2010) <sup>375</sup>        |                                      |                                  |                                | Concurrent | Spearman r = -0.08, Accelerometer |
| Zimmerman et al (2012) <sup>362</sup>  |                                      |                                  |                                | Concurrent | r = 0.84, Direct observation      |

Abbreviations: ICC: Intraclass correlation coefficients EMA: ecological momentary assessment.

<sup>1</sup>The range reported for reliability and validity varies by study based on what was reported in the article – ranges may represent individual items (type of screen, day recalled i.e. weekday/weekend day), samples (e.g. ethnicity of parents, age of children), or time points.
